# Supplementary material for: MicroRNA-146a as a potential regulator involved in the pathogenesis of atopic dermatitis
Source: PubMed Central journal article supplement — Mol Med Rep. 2019 Sep 20;20(5):4645–53. doi: 10.3892/mmr.2019.10695 (PMC6797935; doi:10.3892/mmr.2019.10695), 2019-09-20

Figure S1. GV272 plasmid information. MCS, multiple cloning site.

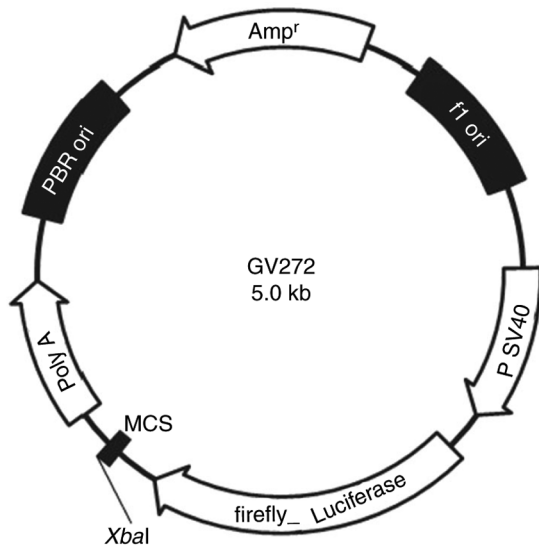

General: 5010 bp  
SV40\_promoter: 48–250  
firefly\_Luciferase: 280–1932  
SV40 late poly A signal: 1964–2185  
pBR322\_origin: 3117–2498  
Ampicillin : 4132–3272  
f1 ori : 4719–4264  
Primer locations and sequences:  
Luc-C-F (1820–1839) : GAGGAGTTGTGTTTGTGGAC  
RVprimer4 (2272–2253) : GACGATAGTCATGCCCCGCG

Figure S2. GV268 plasmid information. MCS, multiple cloning site.

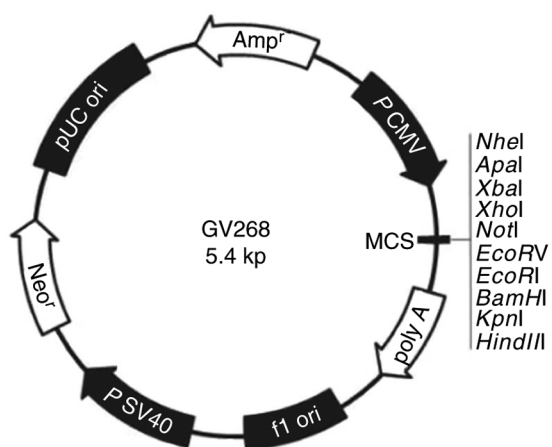

General: 5427 bp  
CMV promoter: 232–819  
BGH poly A: 1027–1251  
f1 ori: 1297–1725  
SV40 promoter: 1730–2073  
Neomycin: 2135–2929  
pUC ori: 4286–3616  
Ampicillin: 5291–4431  
Primer locations and sequences:  
CMV-F (769–789): CGCAAATGGGCGGTAGGCGTG  
pcDNA-SEQR (1121–1101): TTATTAGGAAAGGACAGTGGG

Figure S3. Reverse transcription-quantitative PCR analysis of 293T cells transfected with GV268/miR-146a and negative control. Data are presented as the mean  $\pm$  standard error of the mean (n=3). \*\*P<0.01.

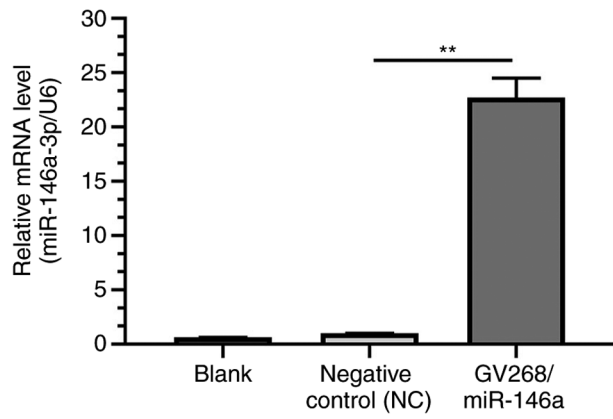

Supplement: Supplementary_Data.pdf [file Supplementary_Data.pdf]
